# Supplementary material for: Awareness of Prevention Strategies and Willingness to Use Preexposure Prophylaxis in Brazilian Men Who Have Sex With Men Using Apps for Sexual Encounters: Online Cross-Sectional Study
Source: PubMed Central journal article supplement (PMC5799718; doi:10.2196/publichealth.8997), 2018-01-22
Supplement: publichealth_v4i1e11_app1.pdf [file publichealth_v4i1e11_app1.pdf]

Multimedia Appendix 1. Factors associated with daily PrEP willingness. Brazil, 2016.

|                                    | Willingness to use PrEP    |                        | Bivariate models |         | Multivariate model        |
|------------------------------------|----------------------------|------------------------|------------------|---------|---------------------------|
|                                    | Yes<br>(N=2653;<br>52.38%) | No<br>(N=2412; 47.62%) | OR (95% CI)      | P value | AOR (95% CI) <sup>a</sup> |
| Age (years)                        |                            |                        |                  | .26     |                           |
| 18-24                              | 611(23.03)                 | 601(24.92)             | Ref.             |         | Ref.                      |
| 25-35                              | 1344(50.66)                | 1171(48.55)            | 1.12(0.98, 1.29) |         | 1.05(0.89, 1.23)          |
| ≥36                                | 698(26.31)                 | 640(26.53)             | 1.07(0.91, 1.25) |         | 1.03(0.86, 1.24)          |
| Color                              |                            |                        |                  | .07     |                           |
| White                              | 1702(64.15)                | 1492(61.86)            | 1.11(0.99, 1.25) |         | 1.10(0.97, 1.24)          |
| Non-white <sup>b</sup>             | 951(35.85)                 | 920(38.14)             | Ref.             |         | Ref.                      |
| Family Monthly Income <sup>c</sup> |                            |                        |                  |         |                           |
| ≤ 3 (low)                          | 852(32.11)                 | 762(31.59)             | Ref.             |         | Ref.                      |
| 4-10 (middle)                      | 1108(41.77)                | 1040(43.12)            | 0.97(0.85, 1.10) |         | 0.91(0.79, 1.06)          |
| >10 (high)                         | 693(26.12)                 | 610(25.29)             | 1.03(0.89, 1.19) |         | 0.96(0.80, 1.14)          |

|                                                 |             |             |                  |       |                  |
|-------------------------------------------------|-------------|-------------|------------------|-------|------------------|
| Schooling                                       |             |             |                  | .73   |                  |
| < 12 years                                      | 1034(38.97) | 922(38.25)  | 1.02(0.91, 1.14) |       | 1.11(0.96, 1.29) |
| ≥ 12 years                                      | 1618(70.03) | 1488(61.75) | Ref.             |       | Ref.             |
| Friends with same sexual orientation            |             |             |                  | .01   | -                |
| Majority                                        | 1827(68.87) | 1541(63.89) | 1.25(1.11, 1.41) |       | -                |
| None or a few                                   | 826(31.13)  | 871(36.11)  | Ref.             |       | -                |
| Number of male sexual partners <sup>c</sup>     |             |             |                  | <.001 |                  |
| 0-5                                             | 1213(45.72) | 1396(57.88) | Ref.             |       | Ref.             |
| 6-10                                            | 529(19.95)  | 472(19.57)  | 1.26(1.09, 1.46) |       | 1.01(0.86, 1.18) |
| >10                                             | 911(34.33)  | 544(22.55)  | 1.93(1.69, 2.20) |       | 1.26(1.09, 1.47) |
| Condomless receptive anal sex <sup>c</sup>      |             |             |                  | <.001 |                  |
| Yes                                             | 1249(47.08) | 872(36.15)  | 1.60(1.42, 1.79) |       | 1.27(1.12, 1.44) |
| No                                              | 1404(52.92) | 1540(63.85) | Ref.             |       | Ref.             |
| Number of male HIV+ sexual partner <sup>c</sup> |             |             |                  | <.001 |                  |

|                                                                                 |             |             |                  |                  |
|---------------------------------------------------------------------------------|-------------|-------------|------------------|------------------|
| None <sup>d</sup>                                                               | 2265(85.37) | 2208(91.54) | Ref.             | Ref.             |
| 1                                                                               | 305(11.50)  | 175(7.30)   | 1.72(1.41, 2.10) | 1.36(1.11, 1.67) |
| >1                                                                              | 83(3.13)    | 28(1.16)    | 2.76(1.79, 4.27) | 1.40(0.89, 2.21) |
| Number of Insertive condomless anal intercourses with HIV+ partner <sup>c</sup> |             |             |                  | <.001            |
| <5 <sup>d</sup>                                                                 | 2365(89.14) | 2250(93.30) | Ref.             | -                |
| ≥5                                                                              | 288(10.86)  | 161(6.70)   | 1.72(1.40, 2.11) | -                |
| Use of apps for sexual encounters                                               |             |             |                  | <.001            |
| Never                                                                           | 180(6.79)   | 256(10.65)  | Ref.             | Ref.             |
| Sometimes                                                                       | 1267(47.81) | 1297(53.95) | 1.42(1.15, 1.75) | 1.12(0.90, 1.40) |
| Daily                                                                           | 1091(41.17) | 707(29.40)  | 2.20(1.77, 2.73) | 1.48(1.17, 1.87) |
| Only when travelling or vacations                                               | 112(4.23)   | 144(6.00)   | 1.10(0.80, 1.52) | 0.91(0.66, 1.27) |
| Money for sex <sup>e</sup>                                                      |             |             |                  | .01              |
| Yes                                                                             | 123(4.66)   | 79(3.29)    | 1.48(1.10, 1.99) | -                |

|                                                  |             |             |                  |                  |
|--------------------------------------------------|-------------|-------------|------------------|------------------|
| No                                               | 2519(95.34) | 2324(96.71) | Ref.             | -                |
| HIV test                                         |             |             |                  | .01              |
| At least once                                    | 2303(86.81) | 2024(83.91) | 1.26(1.08, 1.48) | -                |
| Never                                            | 350(13.19)  | 388(16.09)  | Ref.             | -                |
| Perceived likelihood of getting HIV <sup>f</sup> |             |             |                  | <.001            |
| Low (<50%)                                       | 1655(62.38) | 1861(77.16) | Ref.             | Ref.             |
| High (≥50%)                                      | 733(27.63)  | 350(14.51)  | 2.36(2.03, 2.73) | 1.72(1.47, 2.02) |
| Unknown                                          | 265(9.99)   | 201(8.33)   | 1.51(1.24, 1.85) | 1.39(1.13, 1.70) |
| Know someone living with HIV                     |             |             |                  | <.001            |
| Yes                                              | 1899(71.58) | 1592(66.03) | 1.33(1.17, 1.50) | -                |
| No                                               | 754(28.42)  | 819(33.97)  | Ref.             | -                |
| STI diagnosis <sup>e, g</sup>                    |             |             |                  | <.001            |
| Yes                                              | 384(14.68)  | 220(9.18)   | 1.72(1.44, 2.06) | 1.25(1.03, 1.51) |
| No                                               | 2231(85.32) | 2175(90.82) | Ref.             | Ref.             |

|                                |             |             |                  |       |                  |
|--------------------------------|-------------|-------------|------------------|-------|------------------|
| Binge drinking <sup>e</sup>    |             |             |                  | .02   | -                |
| Yes                            | 1942(73.42) | 1694(70.44) | 1.15(1.02, 1.31) |       | -                |
| No                             | 703(26.58)  | 711(29.56)  | Ref.             |       | -                |
| Stimulants use <sup>e, h</sup> |             |             |                  | <.001 |                  |
| Yes                            | 726(27.37)  | 451(18.70)  | 1.63(1.42, 1.86) |       | 1.24(1.07, 1.43) |
| No                             | 1927(72.63) | 1961(81.30) | Ref.             |       | Ref.             |
| GHB <sup>i</sup>               |             |             |                  | <.001 | -                |
| Yes                            | 148(5.58)   | 74(3.07)    | 1.91(1.43, 2.56) |       | -                |
| No                             | 2505(94.42) | 2338(96.93) | Ref.             |       | -                |
| PrEP awareness                 |             |             |                  | <.001 |                  |
| Yes                            | 1687(63.59) | 1245(51.62) | 1.62(1.44, 1.82) |       | 1.48(1.30, 1.70) |
| No                             | 966(36.41)  | 1167(48.38) | Ref.             |       | Ref.             |
| Willingness to use Condom      |             |             |                  | <.001 |                  |
| Yes                            | 1843(69.47) | 1890(78.36) | Ref.             |       | Ref.             |
| No                             | 810(30.53)  | 522(21.64)  | 1.61(1.42, 1.83) |       | 1.16(1.00, 1.33) |

<sup>a</sup> variables with  $p < 0.25$  in bivariate models were included in the initial multivariate model. Variables with  $p < 0.05$  were kept in the final multivariate model, excepted for age, color and schooling defined a priori, statistically significant associations in *Italics*; <sup>b</sup> Black, Asian, Native American or don't know; <sup>c</sup> Brazilian montly minimun wage in 2016 was 880 BRL (267 USD, currency from July 2016); <sup>d</sup> Including "unknown"; <sup>e</sup> During the previous 6 months; <sup>f</sup> In the next 12 months; <sup>g</sup> syphilis, gonorrhoea or rectal chlamydia; <sup>h</sup> cocaine, poppers, crack or ecstasy; <sup>i</sup> 4-hydroxybutanoic acid.
